# Supplementary material for: Modification of chitosan-coated magnetic material with glycidyltrimethylammonium chloride and its application as heterogeneous base catalyst for levulinic acid esterification
Source: Royal Society of Chemistry journal article supplement (doi:10.1039/d4ma00181h), 2024-01-01
Supplement: d4ma00181h1.pdf [file d4ma00181h1.pdf]

## Electronic Supporting Information

### Modification of Chitosan-coated Magnetic Material with Glycidyltrimethylammonium Chloride and Its Application as Heterogeneous Base Catalyst for Levulinic Acid Esterification

Feri Mukhayani<sup>a</sup>, Yuichi Kamiya<sup>\*b</sup>, Ryoichi Otomo<sup>b</sup>, Eko S. Kunarti<sup>a</sup>, and Nuryono Nuryono<sup>\*a</sup>

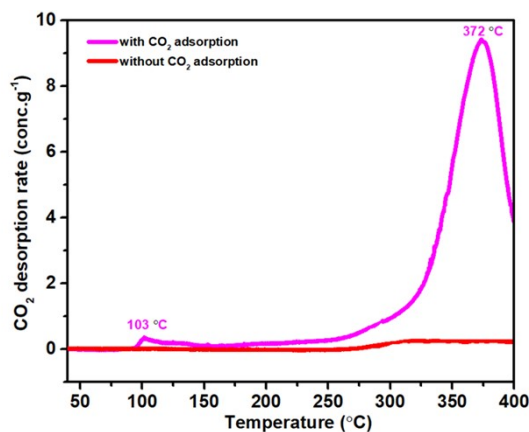

Fig. S1 CO<sub>2</sub>-TPD profiles for MM/Chi/GTMAC taken with and without CO<sub>2</sub> adsorption.

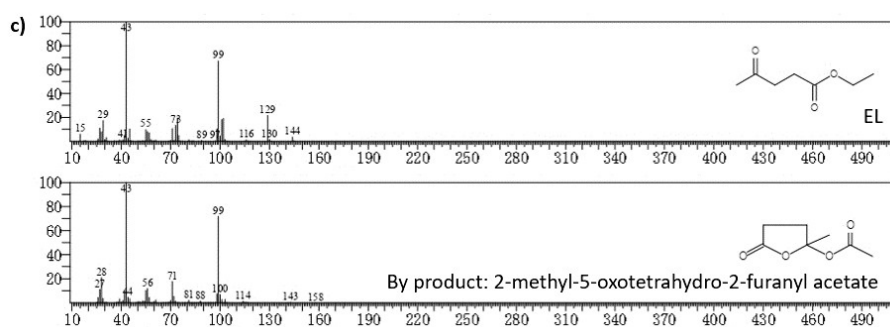

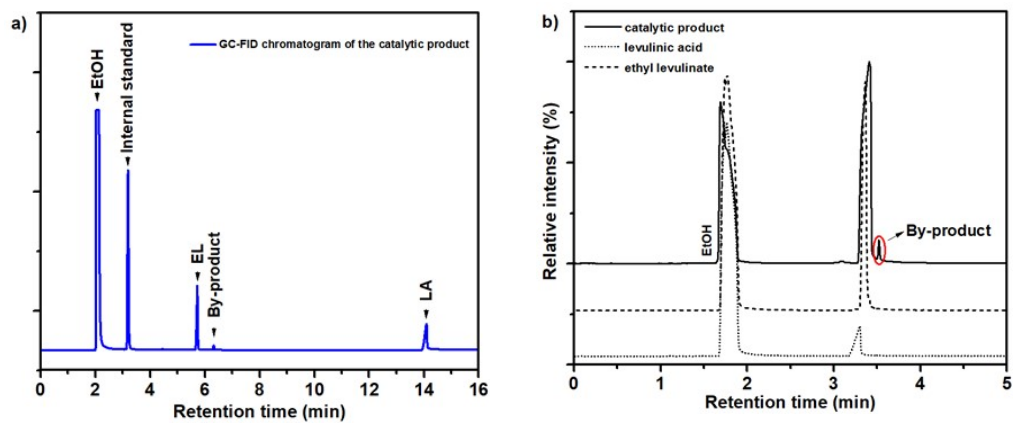

Fig. S2 Chromatograms of (a) GC-FID and (b) GC-MS for the reaction products that were obtained at the temperature of 80 °C for 6 h; and (c) MS spectra of EL and the by-product.

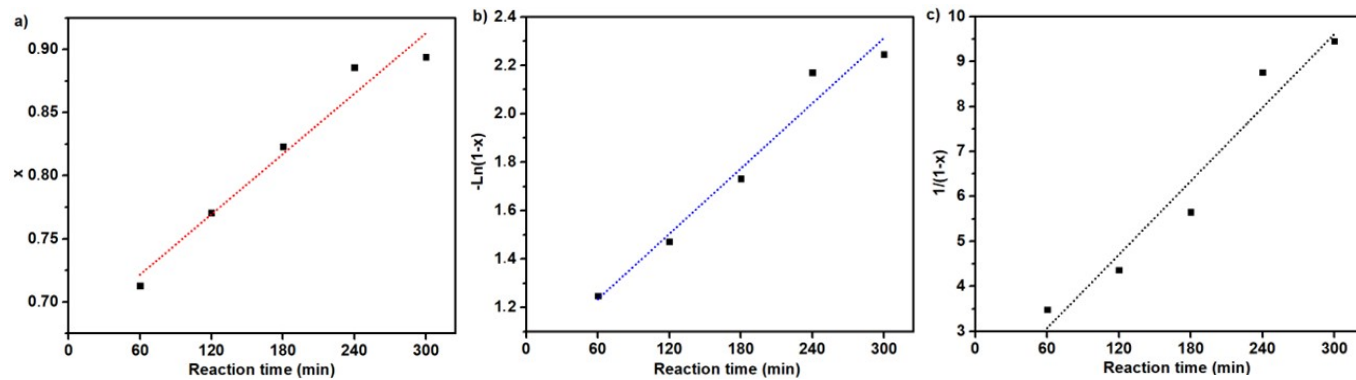

Fig. S3 Linear plots of (a) pseudo-0<sup>th</sup>-order, (b) pseudo-1<sup>st</sup>-order, and (c) pseudo-2<sup>nd</sup>-order kinetics for the reaction over MM/Chi/GTMAC.
